# Supplementary material for: Pot-pollen supplementation reduces fasting glucose and modulates the gut microbiota in high-fat/high-sucrose fed C57BL/6 mice
Source: Royal Society of Chemistry journal article supplement (doi:10.1039/d1fo03019a), 2022-01-01
Supplement: d1fo03019a1.xlsx [file d1fo03019a1.xlsx]

## Sheet: Planilha1
Suplementary Table 2 - Abundance by genera, group and sampling time
Genera/Abundance	Ileum			Cecum			Colon			Feces, week -3			Feces, week 0			Feces, week 2			Feces, week 11
	LF/LS	HF/HS	HF/HS-PP	LF/LS	HF/HS	HF/HS-PP	LF/LS	HF/HS	HF/HS-PP	LF/LS	HF/HS	HF/HS-PP	LF/LS	HF/HS	HF/HS-PP	LF/LS	HF/HS	HF/HS-PP	LF/LS	HF/HS	HF/HS-PP
Acetatifactor	0	0	0	0.355768	0.304346	0.566913	0	0.0936712	0.32109	0.0218846	0.0917693	0.0226886	0.69033	0.187471	0.165579	0.739903	0.14127	0.530195	0.167871	0.120947	0.207208
Akkermansia	0.84109	1.23033	1.8285	1.51347	1.90968	4.21215	2.13038	3.52047	6.47349	0.208967	1.05881	1.21995	10.1446	11.7422	11.9825	10.1943	16.0156	9.8562	8.05234	5.72814	7.04849
Alistipes	0.0370593	0.0703876	0.0373656	0.9179	1.58045	1.68104	0.871549	1.61285	2.21334	6.3384	6.63248	6.47157	0.327879	0.534036	0.699856	1.16341	1.52572	1.978	1.30302	1.7025	1.60242
Allobaculum	79.7757	67.9252	59.135	36.3579	18.6429	17.3342	53.1276	30.4766	28.0463	0.733352	3.64743	0.854957	0.68789	0.663285	0.677068	16.3692	6.39569	13.3703	44.1856	28.9648	25.5898
Anaeroplasma	0	0	0	0.0405705	0	0	0.0586968	0	0	0.0344791	0.159951	0.254716	0.0152081	0.0114875	0	0.135296	0	0	0.0607713	0	0
Anaerotruncus	0	0	0.0156746	0	0.378601	0.455807	0.018211	0.0307785	0.112977	0.146103	0	0.435313	0.414292	2.37017	1.21449	0.121693	0.411868	0.502507	0	0.266834	0.214394
Bacteroides	0.403323	1.29662	0.927433	10.3065	15.1587	13.7288	8.98412	16.6689	16.5241	1.78791	4.96098	5.04765	11.0702	12.9382	13.1422	12.7539	18.4258	16.8092	9.32098	13.0746	13.4272
Bifidobacterium	1.18614	0	0	0.42436	0	0	1.31324	0	0	0	0	0	0	0	0	0.0139101	0	0.00345418	0.246223	0	0
Bilophila	0	0.0135075	0	0.0311736	0.282663	0.1146	0	0.143749	0.177864	0	0.0312081	0	0.0156829	0.190974	0.316754	0.00971251	0.246382	0.0746821	0.0328788	0.162309	0.0596977
Candidatus Arthromitus	0	0	0	0	0	0	0	0	0	1.0845	1.41334	1.14136	0.00947239	0.00805943	0.0197953	0	0.0135754	0	0	0	0
Coprococcus 1	0	0.00961793	0	0.150581	0.366842	0.266384	0.0221729	0.224437	0.114002	0.0125334	0.0338753	0	0.429925	0.608353	0.382898	0.246037	0.325958	0.507011	0.0567244	0.252431	0.145363
Desulfovibrio	0.75825	1.59215	1.3923	16.9137	27.3131	26.8424	5.7032	15.106	13.8665	1.303	2.96124	4.1544	24.8617	26.8433	24.5655	13.7078	20.0634	16.8722	8.76711	15.3389	14.8602
Enterorhabdus	0	0.0527769	0.0517733	0.00689275	0.011363	0	0.0240853	0	0.0199266	0	0.00783727	0	0.0490279	0.0162867	0.0537666	0.0452432	0.0352755	0.0340771	0	0.0269447	0.0433131
Erysipelatoclostridium	0	0	0	0.0487195	0.0695927	0.0568375	0.108838	0.154472	0.199682	0.10855	0.141483	0.305534	0.69132	1.98134	1.94188	0.409306	0.313032	0.733521	0.0923873	0.358482	0.139134
Eubacterium coprostanoligenes group	0	0	0	0.00450227	0	0.0240077	0.0502649	0	0.0412448	0.558852	0.834619	0.797462	1.43336	0.843953	1.64959	0.468198	0.820421	0.213898	0.015556	0	0.0535081
Gemella	0.208545	0.617588	0.378772	0	0.0566448	0.0336389	0	0.0637952	0.0706036	0	0.0101626	0	0	0	0.00787532	0	0.0598473	0.0855053	0.00837499	0.150551	0.01231
Intestinimonas	0	0	0	0.0338276	0.0943197	0.0863806	0	0	0.0419429	0	0.0880759	0	0.0958814	0.135921	0.095323	0.0622182	0.0968141	0.150646	0.057974	0.114773	0.0858505
Lachnoclostridium	0.0288955	0.138787	0.0755046	0.436923	0.686275	0.481794	0.0372049	0.305764	0.254116	0.281813	0.214352	0.212235	0.378131	1.65772	1.36395	0.404348	0.441267	0.508065	0.143251	0.426724	0.135446
Lachnospiraceae FCS020 group	0	0.0108202	0.409551	0.976131	3.97896	3.02746	0.362769	2.30509	0.804619	0.187155	0.305888	0.62387	2.54525	1.42612	4.45659	1.28562	3.02925	2.44483	0.349387	3.13237	1.96979
Lachnospiraceae NK4A136 group	0.02182	0	0.0474376	2.54341	0.638585	1.6601	1.01387	0.28756	0.748776	21.3756	11.5116	11.7813	4.1835	0.742336	0.661051	1.81642	0.52568	0.627064	1.37207	0.239478	0.906458
Lachnospiraceae UCG-001	0	0	0.0326113	0	0	0	0	0	0	2.02995	1.3894	0.739333	0	0.0102575	0	0	0	0	0	0	0
Lachnospiraceae UCG-006	0	0.00185856	0	0.00675341	0.036113	0.0777499	0	0	0.00734948	0	0	0.0155984	0.104881	0.386142	0.186181	0.0332811	0.087234	0.0819551	0	0.0151634	0.0624945
Lactobacillus	3.3244	17.4981	7.6397	1.12842	2.30447	1.72639	2.14546	4.08797	2.48936	4.15898	3.98197	5.20773	2.05997	0.348317	0.444883	3.99966	3.36192	5.53677	2.46609	8.30024	6.35905
Marvinbryantia	0	0.0228426	0	0	0.0874587	0	0	0.144028	0	0.539463	0.222275	0.407355	0	0	0.0854701	0	0	0	0	0.124387	0
Mucispirillum	0.0141189	0.102657	0.0948102	0.739937	2.02168	1.64852	0.11234	0.765486	0.556595	0.977056	0.751564	1.40207	2.47464	6.07319	5.51794	0.487938	1.09748	0.554977	0.202689	0.559081	0.120017
Unclassified	5.98483	2.85474	3.11334	20.2101	15.2168	15.6285	16.9219	16.087	17.363	44.8528	45.9696	50.0842	25.4373	14.3168	14.9782	25.6403	16.9148	17.1204	15.9135	12.34	15.97
Odoribacter	0.00468263	0	0.0055322	0.242304	0.149971	0.399728	0.215009	0.112086	0.356627	0.804734	0.318099	0.598933	0.00736741	0.0197942	0.0495298	0.275154	0.0546568	0.188308	0.270997	0.11587	0.401767
Oscillibacter	0	0	0.00910084	0.802702	0.750233	0.705489	0.280185	0.50025	0.316877	1.25719	0.679512	0.474067	0.905073	0.680173	0.658801	0.854209	0.627369	0.706088	0.618727	0.306076	0.50154
Parabacteroides	0	0.0699751	0.0355707	0.0777999	0.691675	0.255552	0.0275539	0.442728	0.274872	0.0822877	0.181601	0.257209	0.679356	6.2377	5.07121	0.0990458	0.574156	0.358177	0.0438472	0.34023	0.16927
Parasutterella	0	0	0	0	0	0	0	0	0	0.371699	0.397925	0.626408	0	0.0124555	0.214165	0	0	0	0	0	0
Prevotellaceae UCG-001	0	0	0	0	0	0	0	0	0	1.48619	4.11836	1.95944	0.0115774	0.0589521	0.00622137	0.0153781	0.0271509	0	0.0505569	0.00534131	0.00962696
Pseudoflavonifractor	0	0	0	0	0	0.095158	0.0169155	0	0	0.161325	0.16226	0.0723791	0.0504975	0.295892	0.240645	0	0	0.0450542	0.0427455	0.03258	0.0915658
Pseudomonas	0	0.26089	0.0238777	0	0	0	0	0	0.00749906	0.00790363	0.623807	0.0159041	0.00680942	0	0.00348588	0	0	0.00419109	0.00515384	0	0
Rikenellaceae RC9 gut group	0.100279	0.125516	0.137272	1.60024	2.25547	1.26668	2.65204	3.4478	1.67972	1.05487	1.71915	1.97037	4.99274	5.00927	5.0086	3.80302	3.53579	3.85731	2.25697	3.6523	2.38991
Romboutsia	7.18986	5.51978	24.2504	1.37042	0.811108	2.69497	1.98357	1.06559	4.12393	0.104733	0.508942	0.0831495	0.0517651	0	0	0	0	1.32019	1.9736	1.48717	4.44792
Roseburia	0.0128772	0.0307202	0.0911052	0.679479	1.20937	1.58146	0.335307	0.559364	0.927774	5.50116	2.75703	1.27859	1.68409	1.32144	1.0377	1.8601	1.21082	1.78438	0.525829	0.52718	0.833336
Ruminiclostridium 5	0	0	0	0.111369	0.0459488	0.0897609	0	0.0397461	0.00867926	0.00696301	0.0381098	0	0.0178923	0	0	0.0452459	0	0.0391396	0.0647308	0.0193019	0.0358996
Ruminiclostridium 9	0.070875	0.0769198	0.0847632	1.54701	2.6477	2.91165	0.652086	1.59319	1.56594	0.887585	1.09544	0.918331	3.03792	2.1314	2.47981	2.31954	3.23236	2.80997	0.929634	1.93856	1.95384
Ruminococcaceae UCG-005	0	0	0	0	0	0	0	0.0198027	0	0	0.0401301	0.0122508	0.0209134	0.0526512	0.330893	0.0167695	0	0.00679995	0	0.0152513	0
Ruminococcaceae UCG-014	0	0	0.00965904	0.0209409	0	0.0198926	0.128773	0	0.035795	0.792602	0.152153	0.0878251	0	0	0.0265822	0.320501	0	0.0595787	0.0856132	0	0
Ruminococcus 1	0.0372224	0	0	0.318583	0	0	0.67097	0	0	0.734781	0.768036	0.438818	0	0	0	0	0	0	0.244877	0	0
Streptococcus	0	0.478268	0.167371	0	0	0	0	0	0	0	0	0	0	0	0	0	0	0	0	0.00580191	0.0080562
Thalassospira	0	0	0	0.0530067	0.114969	0.13167	0	0.0221915	0.113736	0.00462347	0.0194859	0	0.00586261	0.0211109	0.0275999	0.027078	0	0	0.00727588	0.00331767	0
Tyzzerella	0	0	0.0055322	0.0285557	0.184068	0.194305	0.0316756	0.118555	0.141746	0	0	0.0270399	0.407711	0.123289	0.235469	0.256121	0.389436	0.225355	0.0646706	0.151433	0.145031
